# Supplementary material for: Bioactive hydrogels based on lysine dendrigrafts as crosslinkers: tailoring elastic properties to influence hMSC osteogenic differentiation
Source: Royal Society of Chemistry journal article supplement (doi:10.1039/d4tb01578a), 2024-01-01
Supplement: d4tb01578a1.pdf [file d4tb01578a1.pdf]

## SUPPORTING INFORMATION (S.I.)

### **Bioactive Hydrogels based on Lysine Dendrigrfts as Crosslinkers: Tailoring Elastic Properties to Influence hMSC Osteogenic Differentiation**

Michele Valeo,<sup>a</sup> Sébastien Marie,<sup>b</sup> Murielle Rémy,<sup>a</sup> Tiphaine Menguy,<sup>b</sup> Cédric Le Coz,<sup>c</sup> Michael Molinari,<sup>a</sup> Cécile Feuillie,<sup>a</sup> Fabien Granier,<sup>b</sup> and Marie-Christine Durrieu\*<sup>a</sup>.

<sup>a</sup> Université de Bordeaux, CNRS, Bordeaux INP, CBMN, UMR 5248, Pessac.

<sup>b</sup> FGHI, Montarnaud.

<sup>c</sup> Université de Bordeaux, CNRS, Bordeaux INP, LCPO, ENSMAC, Pessac.

#### **Figures**

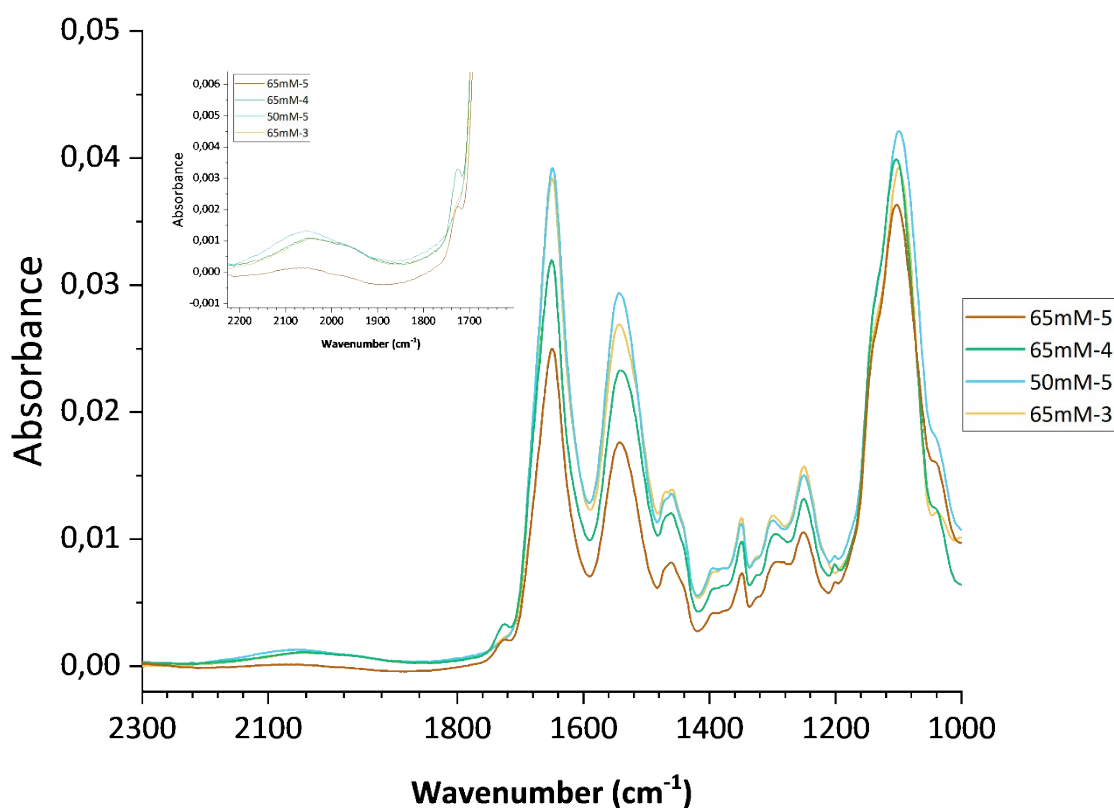

**Figure S1:** FT-ATR spectra of lyophilized DGL G5-PEG hydrogels before surface functionalization, showing the functional groups region (2300 – 1000  $\text{cm}^{-1}$ ). The central portion of the spectrum is occupied by the amide I and II bands at 1648  $\text{cm}^{-1}$  and 1560  $\text{cm}^{-1}$ , respectively. At the right end, the shouldered peak at 1100  $\text{cm}^{-1}$  is the C-O stretching of the dicarboxylic-PEG, not showing differences between the 50 and 65mM gels. Of note, a broad and weak signal is present at  $\approx 2100 \text{ cm}^{-1}$ , indicating carbodiimide traces. Interestingly, the small peak at 1730  $\text{cm}^{-1}$ , attributed to the stretching of uncrosslinked COOH groups in the PEG, indicates the quantitative reaction of the dicarboxylic acid-PEG chains with the terminal amines of DGL G5.

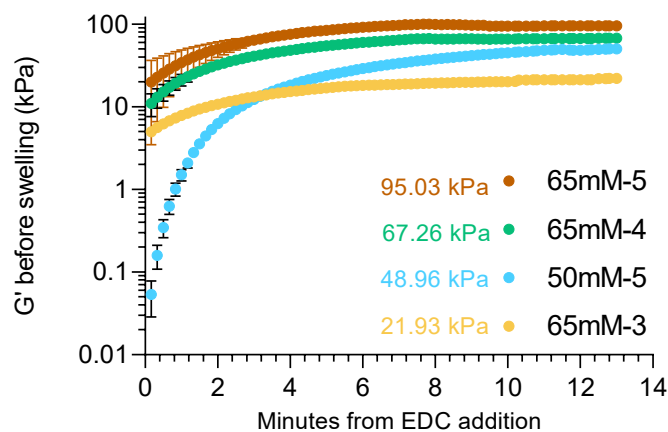

**Figure S2: Time sweeps of *in situ*-polymerized DGL G5-PEG hydrogels.** Hydrogels of the same dicarboxylic acid-PEG content (65mM-5) show symmetric curves, indicating similar crosslinking rates.

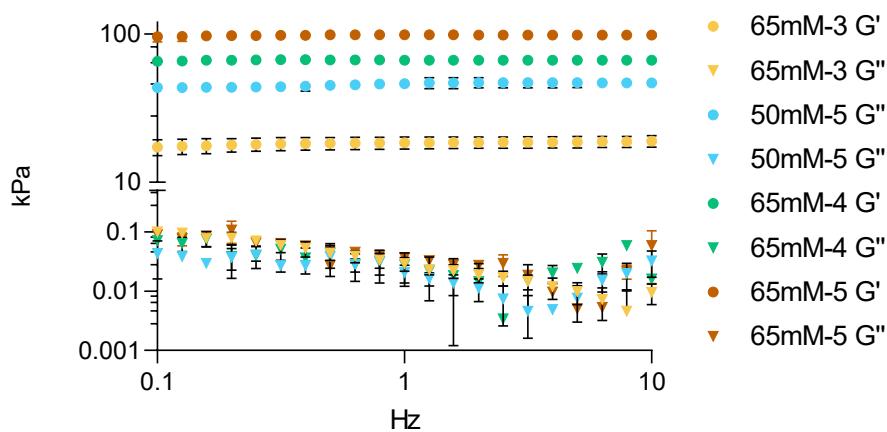

**Figure S3: frequency sweeps of selected DGL G5-PEG hydrogels before swelling (1% shear strain).** The storage modulus ( $G'$ ) is reported in circles and the loss modulus ( $G''$ ) in triangles. Storage modulus at 1Hz was  $18,45 \pm 1,72$  (65mM-3),  $46,33 \pm 3,28$  (50mM-5),  $66,73 \pm 0,898$  (65mM-4) and  $98,83 \pm 4,23$  (65mM-5).

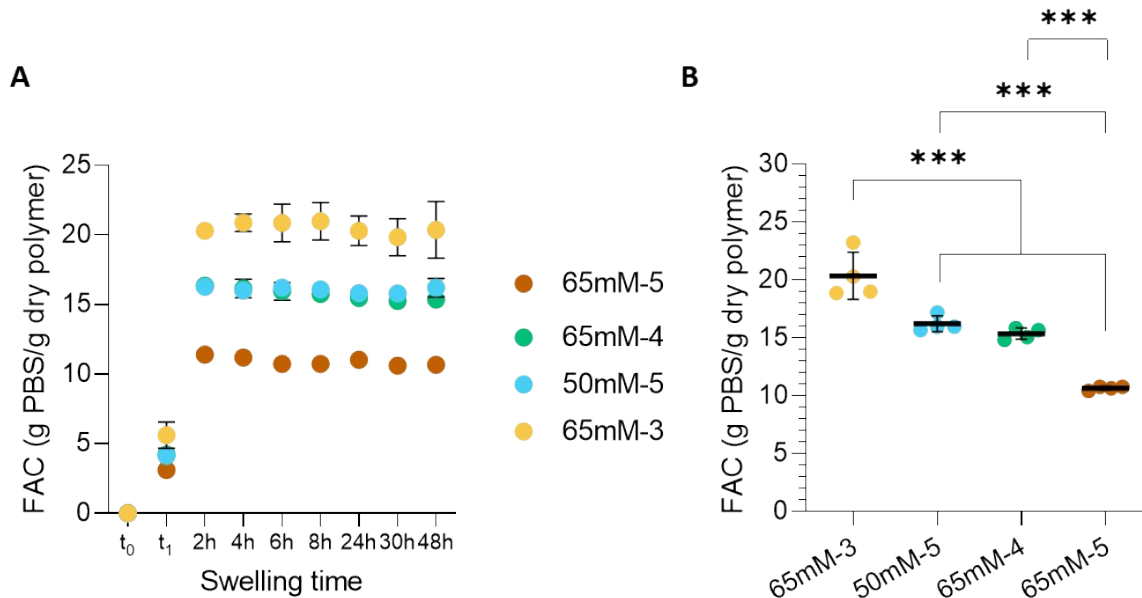

**Figure S4: swelling kinetics of selected DGL G5-PEG gels.** (A), fluid absorption capacity (FAC) expressed as fold increment of the dry hydrogel weight  $W_0$  (taken as the 0 in  $t_0$ ), in PBS at r.t. ( $t_1$  is the hydrogel weight after crosslinking and before swelling). Having polyelectrolyte character due to protonated amine groups at physiological pH, DGL G5-PEG hydrogels exhibited fast swelling at room temperature, reaching equilibrium in approximately 2h. (B), equilibrium fluid absorption capacity (FAC), indicating the g PBS absorbed by each g of dry polymer. At equilibrium, 65mM-3 gels absorbed approximately 20 times their initial dry weight ( $W_0$ ) in PBS, 50mM-5 and 65mM-4 gels 15 times, and 65mM-5 gels 10 times. ONE-WAY ANOVA (with Tuckey's correction for multiple comparisons) analysis, with  $P < 0.05$  (\*),  $P < 0.01$  (\*\*),  $P < 0.001$  (\*\*\*). Not significant =  $P > 0.05$ . All statistical tests are reported at the end of the Supplementary Information.

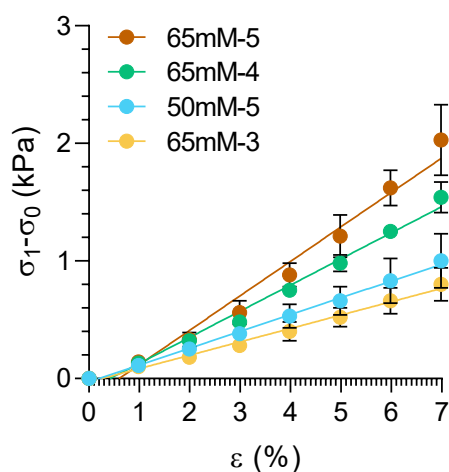

**Figure S5: stress-strain curves of non-functionalised, swollen DGL G5-PEG hydrogels.** Uniaxial strain was measured in non-confined compression up to 5% of the initial length.

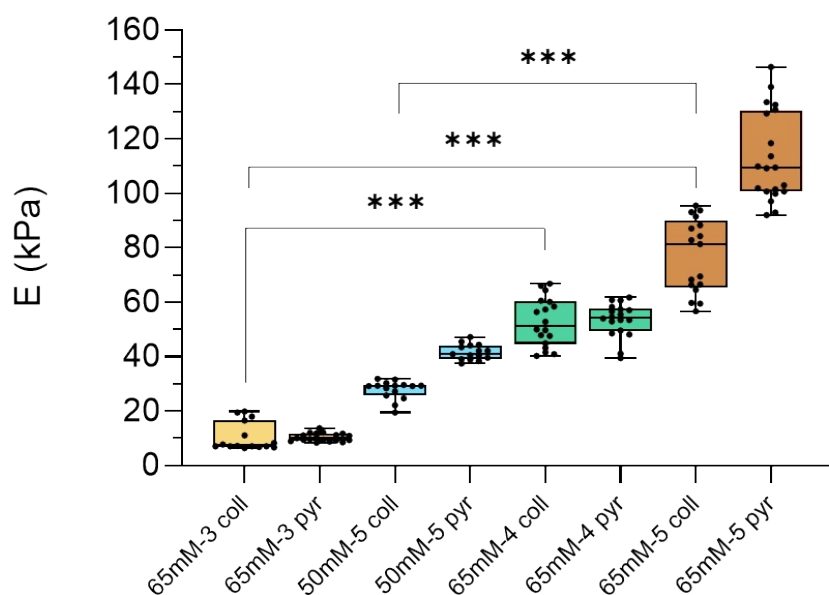

**Figure S6: paired comparison of surface E values obtained by AFM indentations with a colloidal (coll) or pyramidal (pyr) tip.** Each point represents the averaged E value over a squared array of  $400 \mu\text{m}^2$  ( $20 \times 20$ ). At least five different regions were analysed per gel. No statistical difference was found in paired E values obtained with the colloidal or pyramidal tip geometry. Group comparisons of data obtained with the colloidal tip showed statistical significance only among non-nearby groups. N (gels) = 3, non-parametric analysis (Kruskal-Wallis test) with  $P < 0.05$  (\*),  $P < 0.01$  (\*\*),  $P < 0.001$  (\*\*\*) . All statistical tests are reported at the end of the Supplementary Information.

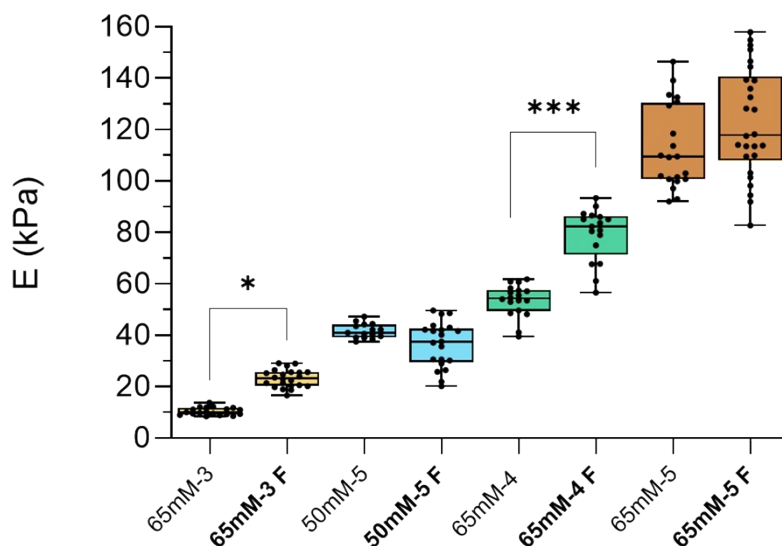

**Figure S7: paired comparison of surface E values measured with a pyramidal tip before and after (F) functionalisation with GRGDSPC and BMP-2 mimetic peptides.** Each point represents the averaged E value over a squared array of  $400 \mu\text{m}^2$  ( $20 \times 20$ ). At least five different regions were analysed per gel. N (gels) = 3, One-way ANOVA (Tukey's correction for multiple comparisons) with  $P < 0.05$  (\*),  $P < 0.01$  (\*\*),  $P < 0.001$  (\*\*\*) . Not significant =  $P > 0.05$ . All statistical tests are reported All statistical tests are reported at the end of the Supplementary Information.

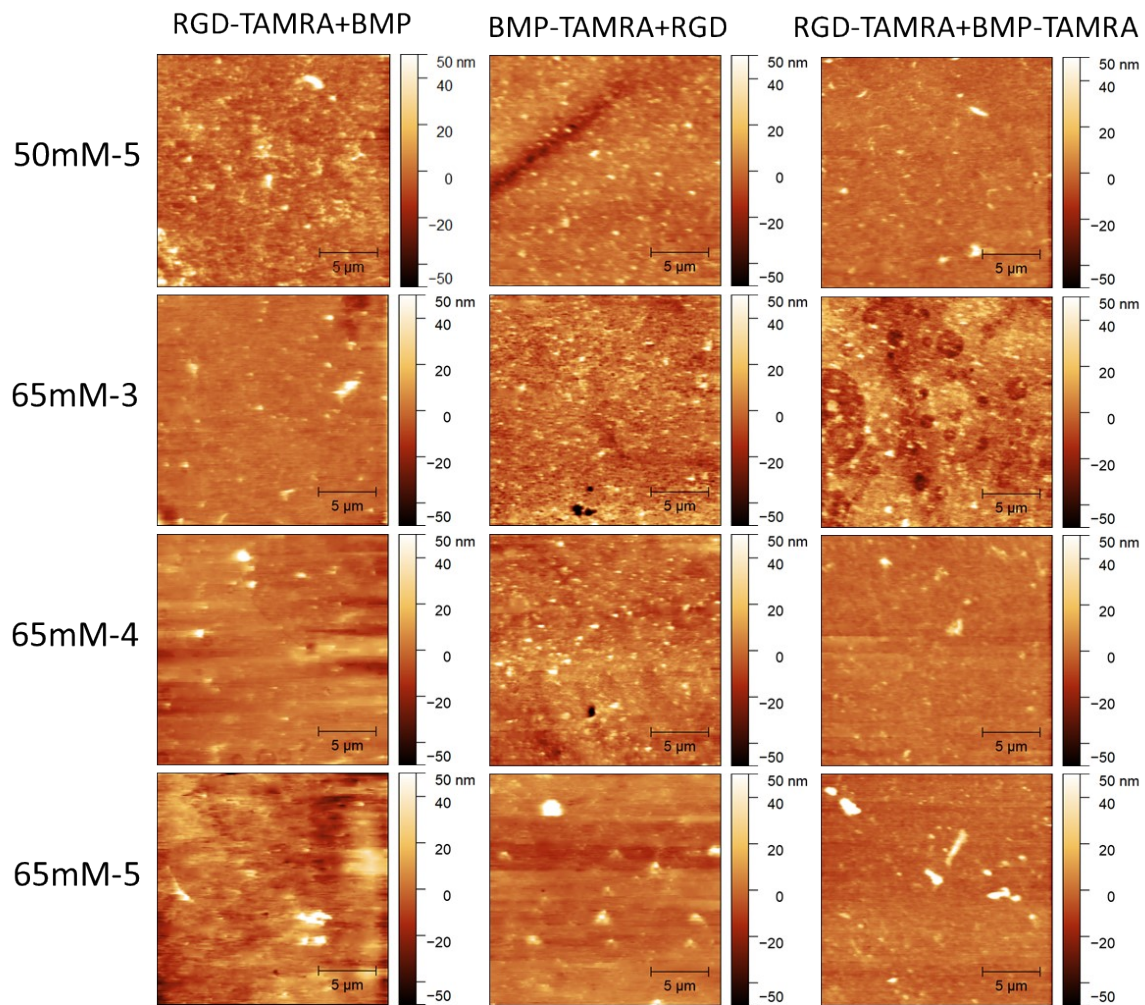

**Figure S8: surface topography (height sensor images) of DGL G5-PEG hydrogels after surface functionalization with peptides.** Three representative images, measured over 400 μm<sup>2</sup> each, are shown per condition, reporting surfaces grafted with GRGDSPC-TAMRA+BMP-2 bp (left), BMP-2-TAMRA bp + GRGDSPC (middle) and GRGDSPC-TAMRA + BMP-2-TAMRA bp (right).

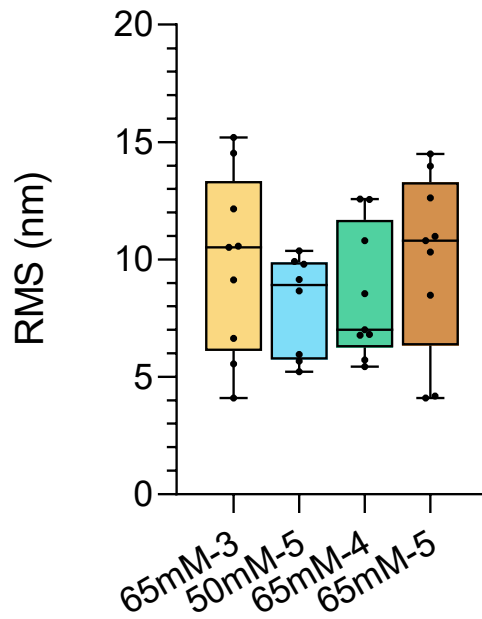

**Figure S9: root mean square roughness (RMS) of selected DGL G5-PEG hydrogel surfaces after peptide grafting to the surface.** Each point represents the averaged RMS value over a squared array of  $400 \mu\text{m}^2$  ( $20 \times 20$ ). At least three different regions were analysed per gel. N (gels) = 3, One-way ANOVA (Tukey's correction for multiple comparisons) with  $P < 0.05$  (\*),  $P < 0.01$  (\*\*),  $P < 0.001$  (\*\*\*). Not significant =  $P > 0.05$ . All statistical tests are reported at the end of the Supplementary Information.

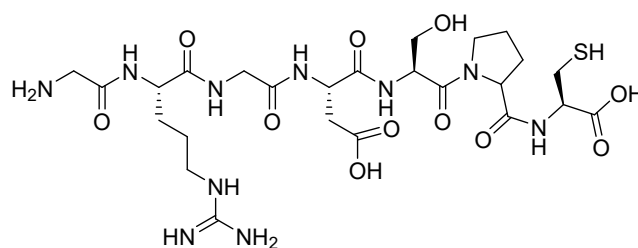

GRGDSPC peptide (A)

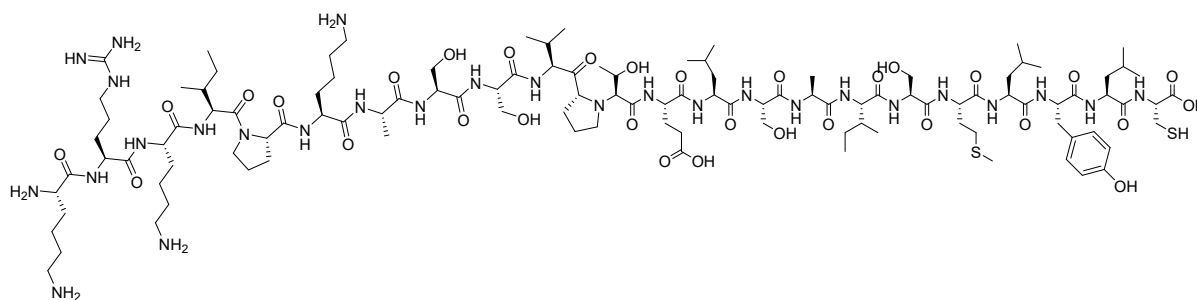

KRKIPKASSVPTELSAISMLYLC peptide (BMP-2 bp, B)

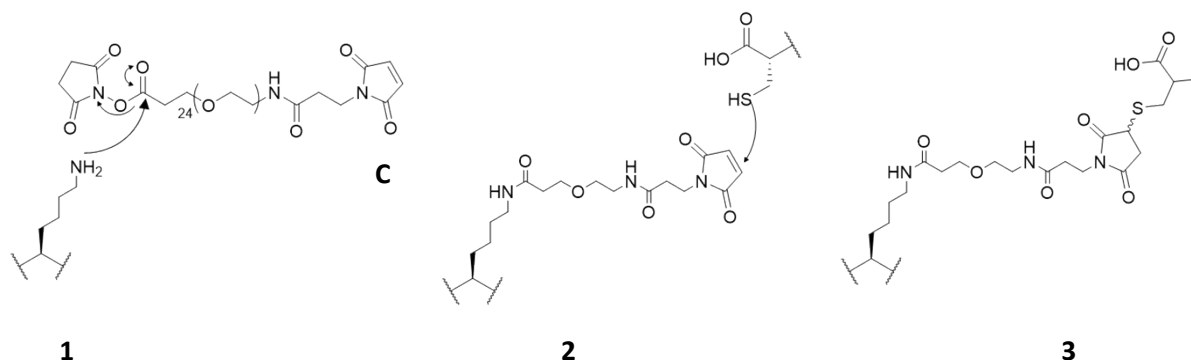

**Figure S10: surface functionalization strategy of DGL G5-PEG hydrogels after crosslinking.** Cysteine-containing peptides, the GRGDSPC (A) and BMP-2 bp (B), are covalently grafted using a maleimide-PEG-NHS spacer (C). This spacer is first reacted with the free  $\alpha$  (not shown) and  $\epsilon$ -amine groups available on DGL G5 surfaces via a nucleophilic substitution (eliminating N-hydroxysuccinimide, not shown) in 10mM phosphate buffered solution at pH 7.3 (1). Then, once hydrogel surfaces are activated by exposing maleimide units (2), the peptides are selectively conjugated at the C-ter (Cys) via a thiol-maleimide reaction in 10mM phosphate buffered solution at pH 7.3. Possibly, maleimide hydrolysis leads to ring opening but not peptide lost.

GRGDSPC-TAMRA + BMP-2 bp

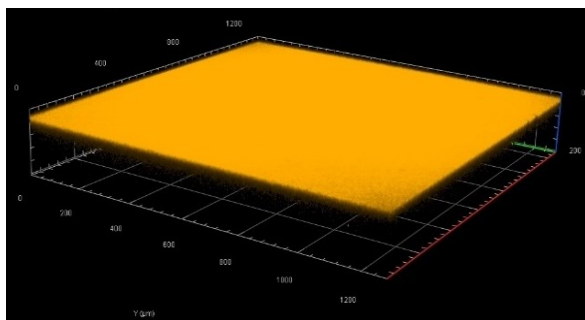

BMP-TAMRA bp + GRGDSPC

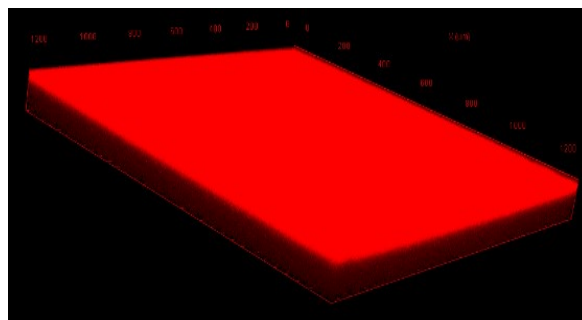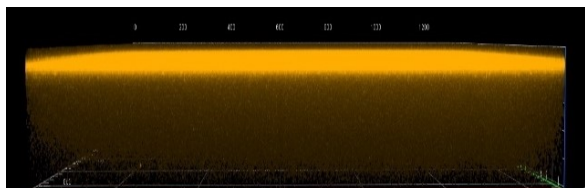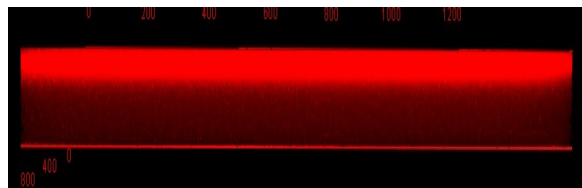

**Figure S11: 3D-reconstruction of a Z-stack obtained in confocal microscopy of 50mM-5 DGL G5-PEG hydrogels.** It shows that the highest fluorescence intensity of TAMRA-tagged peptides is present at the hydrogel's top surface layers, over a gradient of about 50 microns. Pixel intensities were adjusted to avoid oversaturation of most intense layers (10x objective, 0.45 NA).



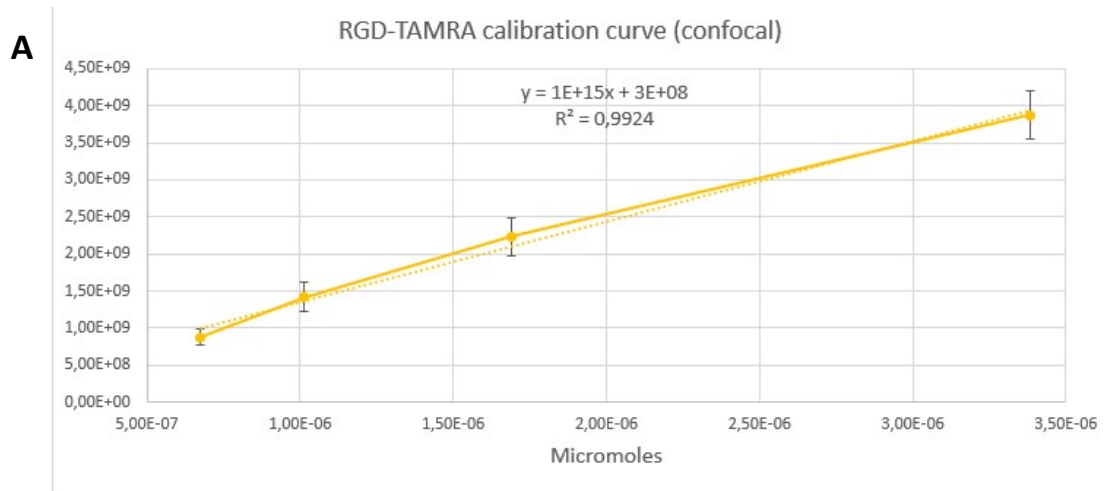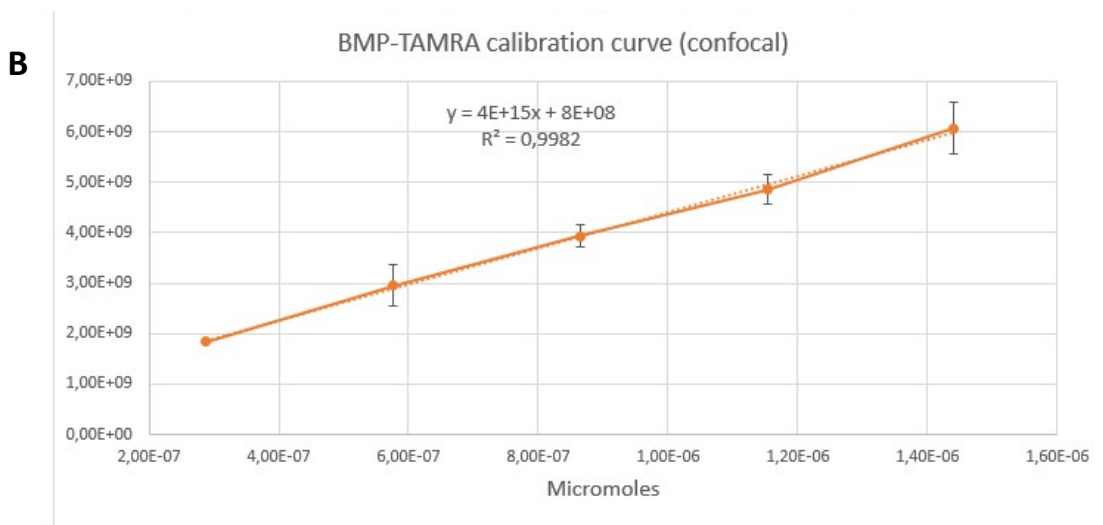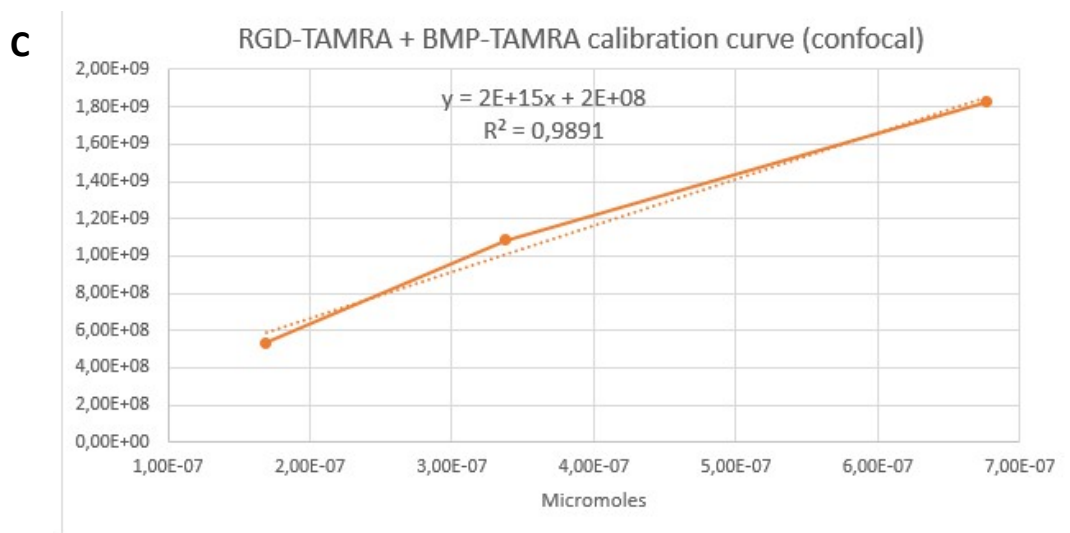

**Figure S12: calibration curves for fluorescent peptides combinations.** The curves were obtained in confocal microscopy for GRGDSPC-TAMRA peptides (yellow, **A**), BMP-2-TAMRA bp (red, **B**) and 1:1 GRGDSPC-TAMRA + BMP-2-TAMRA peptide mixtures (orange, **C**).

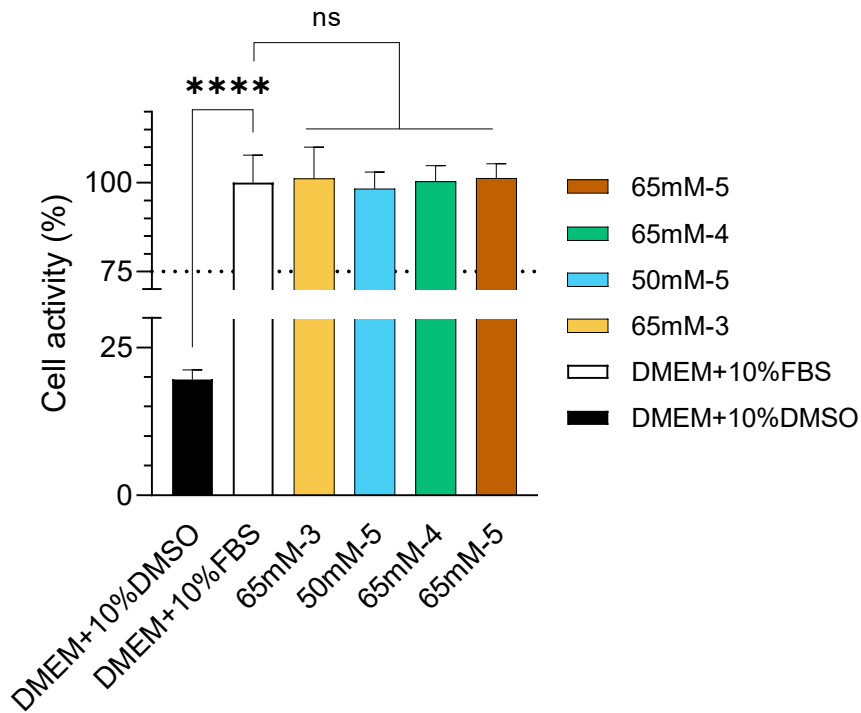

**Figure S13: undirect cytotoxicity test of unfunctionalized DGL G5-PEG hydrogels.** hMSC P5 metabolic activity (reduction potential) measured photometrically using an XTT test (O.D.<sub>490</sub> – O.D.<sub>690</sub>), normalized to cell activity in the control (DMEM+10%FBS, 100% of activity). N=6 wells per conditions, three readings per well. ONE-WAY ANOVA (uncorrected Fisher's LSD) analysis, with P<0.05 (\*), P<0.01 (\*\*), P<0.001 (\*\*\*). Not significant = P > 0.05. All statistical tests are reported All statistical tests are reported at the end of the Supplementary Information.

65mM-3

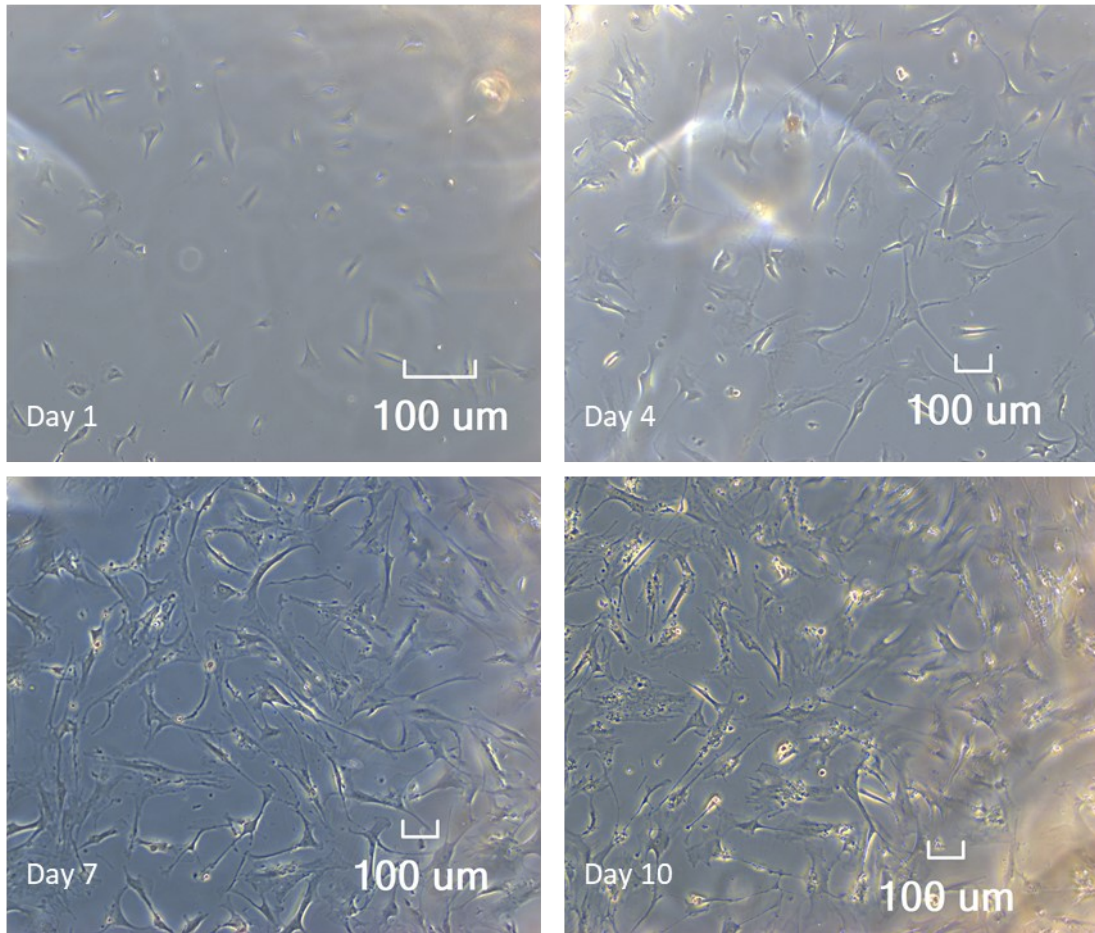

**Figure S14, A:** phase contrast images of hMSCs cultured over DGL G5-PEG hydrogels (65mM-3 condition) at different culture time points (1 day after seeding, 4 days after seeding, 7 days after seeding and 10 days after seeding) in osteogenic differentiation medium. On day 14, cells were fixed.

50mM-5

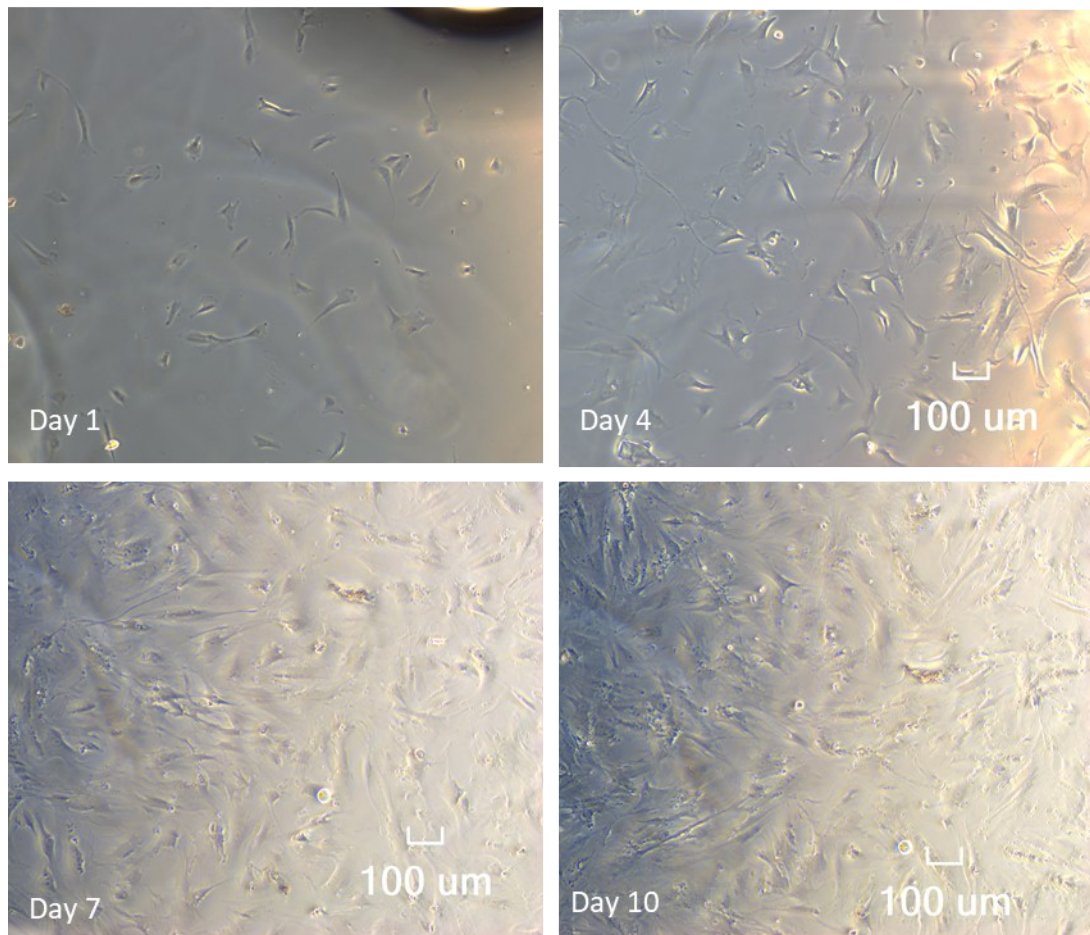

**Figure S14, B:** phase contrast images of hMSCs cultured over DGL G5-PEG hydrogels (50mM-5 condition) at different culture time points (1 day after seeding, 4 days after seeding, 7 days after seeding and 10 days after seeding) in osteogenic differentiation medium. On day 14, cells were fixed.

65mM-4

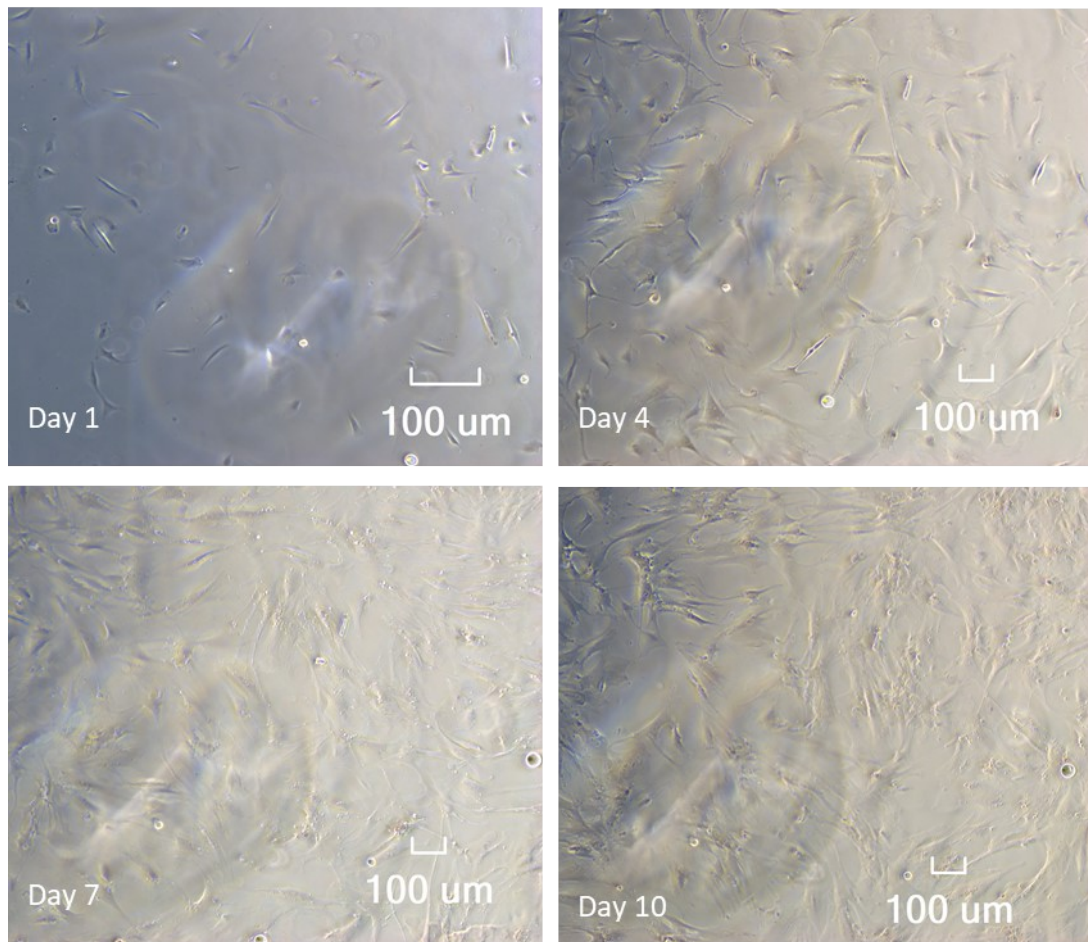

**Figure S14, C:** phase contrast images of hMSCs cultured over DGL G5-PEG hydrogels (65mM-4 condition) at different culture time points (1 day after seeding, 4 days after seeding, 7 days after seeding and 10 days after seeding) in osteogenic differentiation medium. On day 14, cells were fixed.

65mM-5

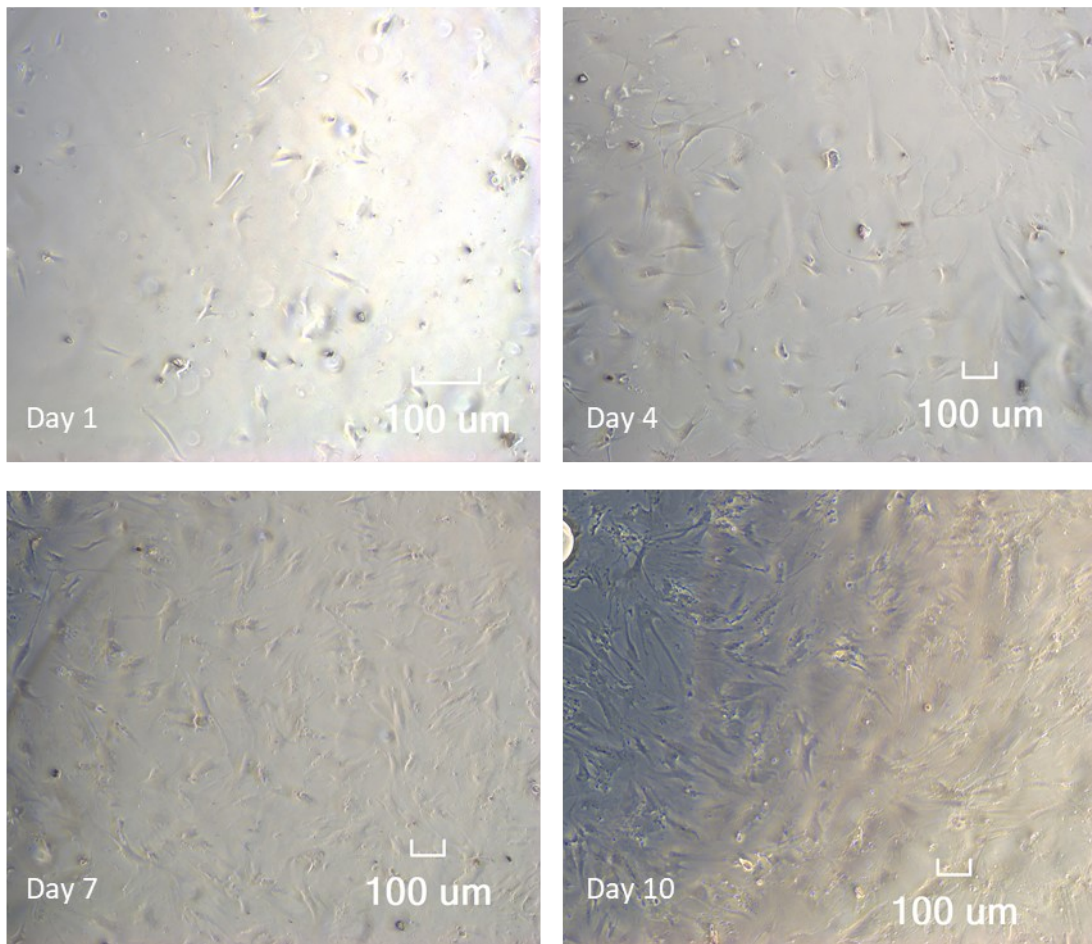

**Figure S14, D:** phase contrast images of hMSCs cultured over DGL G5-PEG hydrogels (65mM-5 condition) at different culture time points (1 day after seeding, 4 days after seeding, 7 days after seeding and 10 days after seeding) in osteogenic differentiation medium. On day 14, cells were fixed.

Glass

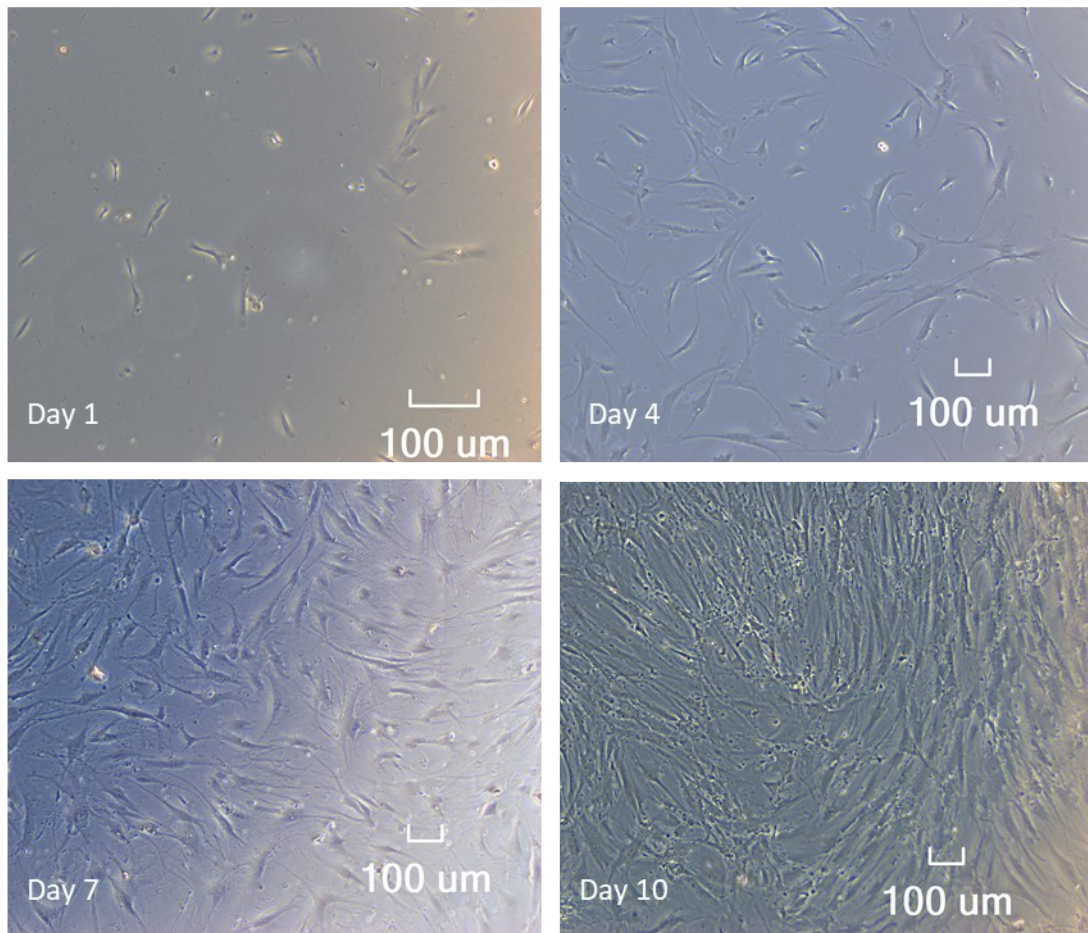

**Figure S14, E:** phase contrast images of hMSCs cultured over glass controls at different culture time points (1 day after seeding, 4 days after seeding, 7 days after seeding and 10 days after seeding) in osteogenic differentiation medium. On day 14, cells were fixed.

## Tables

Molar ratio of reactive groups in the crosslinking reaction

|                         | [NH <sub>2</sub> /COOH] 3     | [NH <sub>2</sub> /COOH] 4     | [NH <sub>2</sub> /COOH] 5     | [NH <sub>2</sub> /COOH] 6                                 |
|-------------------------|-------------------------------|-------------------------------|-------------------------------|-----------------------------------------------------------|
| [dicarboxylic-PEG] 50mM | 50mM-3<br>[DGL-G5]<br>0,42 mM | 50mM-4<br>[DGL-G5]<br>0,57 mM | 50mM-5<br>[DGL-G5]<br>0,71 mM | 50mM-6<br>[DGL-G5]<br>0,85 mM                             |
| [dicarboxylic-PEG] 65mM | 65mM-3<br>[DGL-G5]<br>0,56 mM | 65mM-4<br>[DGL-G5]<br>0,74 mM | 65mM-5<br>[DGL-G5]<br>0,92 mM | Molar concentration<br>of DGL-G5 in the final<br>solution |

**Table S1: formulations of DGL G5-PEG hydrogels.** The concentration of DGL G5 in the final solution (in black in the table) was calculated according to the final concentration of dicarboxylic acid-PEG (50 mM or 65 mM) and the desired excess of amines available to react per carboxylic group (NH<sub>2</sub>/COOH molar ratio, from 3 to 6).

| Swelling experiments |        |        |        |
|----------------------|--------|--------|--------|
| 65mM-3               | 50mM-5 | 65mM-4 | 65mM-5 |
| 65mM-3               | ***    | ***    | ***    |
|                      | 50mM-5 | ns     | ***    |
|                      |        | 65mM-4 | ***    |
|                      |        |        | 65mM-5 |

**Table S2: ONE-WAY ANOVA (Tuckey's correction for multiple comparisons) analysis of the fluid absorption capacity (FAC, g PBS/g dry polymer).** Calculations for equilibrium swelling experiments conducted at r.t. ONE-WAY ANOVA (with Tuckey's correction for multiple comparisons) analysis, with P<0.05 (\*), P<0.01 (\*\*), P<0.001 (\*\*\*). Not significant = P > 0.05.



| Rheometry/rheometry |                  |                  |                  |
|---------------------|------------------|------------------|------------------|
| 65mM-3 rheometry    | 50mM-5 rheometry | 65mM-4 rheometry | 65mM-5 rheometry |
| 65mM-3 rheometry    | ns               | ***              | ***              |
|                     | 50mM-5 rheometry | **               | ***              |
|                     |                  | 65mM-4 rheometry | *                |
|                     |                  |                  | 65mM-5 rheometry |

| Compression/compression |                    |                    |                    |
|-------------------------|--------------------|--------------------|--------------------|
| 65mM-3 compression      | 50mM-5 compression | 65mM-4 compression | 65mM-5 compression |
| 65mM-3 compression      | ns                 | ***                | ***                |
|                         | 50mM-5 compression | *                  | ***                |
|                         |                    | 65mM-4 compression | *                  |
|                         |                    |                    | 65mM-5 rheometry   |

| Compression/Rheometry |                  |                  |                  |                  |
|-----------------------|------------------|------------------|------------------|------------------|
|                       | 65mM-3 rheometry | 50mM-5 rheometry | 65mM-4 rheometry | 65mM-5 rheometry |
| 65mM-3 compression    | ns               |                  |                  |                  |
| 50mM-5 compression    |                  | ns               |                  |                  |
| 65mM-4 compression    |                  |                  | ns               |                  |
| 65mM-5 compression    |                  |                  |                  | ns               |

**Table S3: ONE-WAY ANOVA (Tuckey's correction for multiple comparisons) analysis of Young's modulus calculated from rheometry and compression measurements. P<0.05 (\*), P<0.01 (\*\*), P<0.001 (\*\*\*). Not significant = P > 0.05.**

| 65mM-3        |            |               |            |                        |            | 50mM-5        |            |               |            |                        |            |
|---------------|------------|---------------|------------|------------------------|------------|---------------|------------|---------------|------------|------------------------|------------|
| Colloidal tip |            | Pyramidal tip |            | Pyramidal tip after F. |            | Colloidal tip |            | Pyramidal tip |            | Pyramidal tip after F. |            |
| m             | SD         | m             | SD         | m                      | SD         | m             | SD         | m             | SD         | m                      | SD         |
| 6,41185108    | 0,22402177 | 11,925712     | 2,08024888 | 18,7863846             | 2,61629426 | 30,2851297    | 6,16609015 | 45,5132721    | 8,09177097 | 24,6066794             | 3,46336526 |
| 6,675798      | 0,39173871 | 9,78802953    | 2,18497455 | 20,2873649             | 4,98048935 | 29,4095809    | 7,53135564 | 44,1639       | 9,69122445 | 24,3738538             | 4,68857692 |
| 7,08159815    | 0,34665021 | 10,0545775    | 1,26432337 | 23,5246862             | 4,04336149 | 27,2793018    | 5,60822699 | 47,2492638    | 15,8506868 | 23,0931508             | 3,37334925 |
| 7,228174      | 0,29395381 | 8,60469375    | 1,04330724 | 21,3684308             | 3,33352409 | 29,2957208    | 6,26446249 | 43,477721     | 8,39436217 | 29,0347215             | 6,00468139 |
| 7,16657508    | 0,28914185 | 9,5891425     | 1,3348637  | 23,9489651             | 4,06635314 | 28,5021053    | 6,07897534 | 41,0479073    | 7,89588411 | 30,5696538             | 5,31922883 |
| 7,75669292    | 0,53159593 | 8,46368159    | 1,50767966 | 22,5003015             | 3,19151167 | 19,563962     | 5,85485354 | 38,9980661    | 6,44747355 | 30,15992               | 9,87699246 |
| 8,30761646    | 0,4434047  | 9,38781836    | 2,04052228 | 20,2243692             | 5,27057595 | 29,3355216    | 10,1127072 | 38,5128406    | 8,9687561  | 30,5540723             | 4,51220908 |
| 7,13487415    | 0,30626178 | 9,26912625    | 0,88707056 | 28,1387538             | 3,20673882 | 29,6801625    | 8,99608346 | 44,4072       | 12,2446637 | 20,2364794             | 3,01365724 |
| 6,89324231    | 0,40282683 | 10,2795539    | 1,19191723 | 16,6542862             | 3,46846763 | 24,7596787    | 8,31674616 | 37,5179552    | 7,86042722 | 25,7657185             | 3,55810055 |
| 7,12860477    | 0,40836316 | 9,58830672    | 0,89844102 | 19,836356              | 6,19209277 | 22,1541142    | 6,79869183 | 39,1349698    | 8,3117046  | 26,4282391             | 3,7581754  |
| 11,1231074    | 0,91020347 | 11,2858442    | 0,87319638 | 24,6847172             | 6,15472984 | 31,946934     | 9,01762095 | 42,1334422    | 9,25849075 | 49,7011953             | 11,2745274 |
| 16,6072646    | 1,23181371 | 12,0272878    | 1,74207391 | 29,0020422             | 4,7486555  | 25,8247321    | 7,72171573 | 40,4466813    | 7,3040606  | 43,0545615             | 8,99786889 |
| 19,9350431    | 0,57883814 | 11,1530042    | 1,27397722 | 26,5305692             | 4,75298478 | 29,3766474    | 8,15220735 | 39,6465188    | 4,94553447 | 40,151722              | 8,57246554 |
| 19,5736954    | 1,07716579 | 13,7731945    | 2,23448275 | 18,9857138             | 5,4112966  | 29,3325625    | 5,8863696  | 40,6113563    | 8,78088076 | 41,713305              | 9,72832418 |
| 18,1061922    | 0,46721598 | 17,2418938    | 1,60479585 | 25,2136938             | 5,67481667 | 31,7179387    | 7,497393   | 42,1556281    | 9,05855124 | 42,1730523             | 8,98876447 |
|               |            | 12,1556452    | 1,33428099 | 21,3488923             | 4,83565528 |               |            | 48,0602647    | 10,5498745 | 43,7758723             | 6,90871558 |
|               |            | 11,7425186    | 1,69307615 | 20,6270858             | 4,34555341 |               |            |               |            | 48,2697292             | 10,1256668 |
|               |            | 11,0163416    | 1,5022586  | 23,0104692             | 4,62973974 |               |            |               |            | 48,5573587             | 9,84471635 |
|               |            | 9,03439172    | 1,33659978 | 25,6040769             | 5,13438677 |               |            |               |            | 41,5999985             | 6,98409976 |
|               |            | 8,87788064    | 1,76647697 | 29,1269415             | 4,79251062 |               |            |               |            | 35,6213815             | 5,15650395 |
|               |            |               |            | 25,4891831             | 4,28299383 |               |            |               |            | 37,5036431             | 5,24032779 |
|               |            |               |            | 25,6408234             | 6,0567103  |               |            |               |            | 37,1683127             | 6,4900208  |
|               |            |               |            |                        |            |               |            |               |            | 42,0049266             | 7,86597804 |

| 65mM-4        |            |               |            |                        |            | 65mM-5        |            |               |            |                        |            |
|---------------|------------|---------------|------------|------------------------|------------|---------------|------------|---------------|------------|------------------------|------------|
| Colloidal tip |            | Pyramidal tip |            | Pyramidal tip after F. |            | Colloidal tip |            | Pyramidal tip |            | Pyramidal tip after F. |            |
| m             | SD         | m             | SD         | m                      | SD         | m             | SD         | m             | SD         | m                      | SD         |
| 43,2944883    | 8,33799736 | 58,3986344    | 9,33694324 | 56,6161906             | 14,6369577 | 64,5882422    | 20,8221646 | 118,406913    | 34,5415209 | 94,4520438             | 22,6835238 |
| 44,987505     | 11,3043886 | 61,7977344    | 9,60022462 | 61,1607062             | 15,0388348 | 69,5554781    | 22,3524648 | 100,737898    | 32,3553614 | 98,2307525             | 24,0454587 |
| 52,8190869    | 11,0133191 | 60,764725     | 11,77928   | 67,7773908             | 12,890615  | 56,7853063    | 16,8533604 | 100,744469    | 28,1203266 | 101,445157             | 22,8038931 |
| 56,428073     | 14,7227498 | 53,5233746    | 6,5783633  | 67,6772985             | 12,1033675 | 66,6197484    | 22,2101219 | 101,539402    | 14,2135235 | 109,991738             | 30,2263216 |
| 47,7299175    | 11,1455462 | 57,1791469    | 8,19133888 | 86,6395662             | 25,5297267 | 66,3216031    | 15,3490211 | 101,993075    | 21,6282633 | 109,495389             | 20,0485596 |
| 41,718118     | 8,38847313 | 54,6038333    | 12,1492774 | 82,3380385             | 15,6065173 | 59,4777453    | 17,8587628 | 132,658847    | 22,5010492 | 113,825252             | 23,6414004 |
| 66,0948408    | 21,876907  | 52,9818918    | 15,0531276 | 85,13596               | 11,9816912 | 93,1225563    | 33,32116   | 130,732423    | 29,0388971 | 117,472681             | 24,6845025 |
| 64,5186795    | 18,6415442 | 67,5839636    | 29,8872813 | 83,6197431             | 14,8221598 | 82,83795      | 29,9813243 | 133,538122    | 48,0248175 | 114,097606             | 17,1153802 |
| 60,6116008    | 18,5394748 | 56,5866       | 17,9835774 | 86,03632               | 16,1462781 | 93,8361365    | 35,8025818 | 146,454905    | 36,6100072 | 113,532002             | 24,021818  |
| 66,8578984    | 20,5798081 | 55,4816306    | 29,1290599 | 85,06794               | 12,8730912 | 91,5876891    | 37,0175992 | 139,19515     | 43,0005335 | 128,246066             | 19,6978624 |
| 60,1912257    | 13,2038853 | 53,5539159    | 14,7359198 | 75,0185138             | 16,8233083 | 95,4976375    | 34,3984257 | 92,1112224    | 26,6637936 | 103,185616             | 30,5166957 |
| 57,4282984    | 16,6120989 | 57,3805109    | 10,1096068 | 80,4538719             | 16,5068645 | 87,0763609    | 23,6569687 | 129,462512    | 28,0044664 | 118,171487             | 23,2573296 |
| 58,4660361    | 24,2152232 | 48,6108281    | 13,9846424 | 78,9849781             | 17,4284197 | 88,3304406    | 22,304738  | 113,620033    | 25,0764695 | 113,497784             | 51,6848156 |
| 41,0076514    | 7,59412024 | 41,0868906    | 6,16977273 | 80,8545                | 27,271351  | 84,2852234    | 27,7218165 | 109,295481    | 28,7542025 | 91,9444635             | 30,4313151 |
| 47,8768787    | 11,803715  | 54,0002381    | 8,07344055 | 87,2484923             | 18,7712199 | 68,2699313    | 22,746299  | 102,939397    | 30,5827979 | 82,7509569             | 22,0077547 |
| 40,3066602    | 7,86686648 | 60,8281286    | 11,4960805 | 90,20714               | 24,0660088 | 81,42895      | 28,0365474 | 109,56618     | 21,3748177 | 154,821038             | 31,415581  |
| 49,8658066    | 11,6728929 | 39,5968656    | 5,98034283 | 93,4200297             | 21,7858396 | 59,8253859    | 13,5918116 | 97,1547111    | 20,854006  | 151,075443             | 41,2893246 |
| 50,0964223    | 11,3320596 | 49,6426453    | 4,36269512 |                        |            |               |            | 99,9735266    | 23,8247808 | 139,117145             | 37,3525174 |
|               |            | 48,2343734    | 4,16073257 |                        |            |               |            | 92,950041     | 24,0939264 | 157,987878             | 36,5504816 |
|               |            |               |            |                        |            |               |            | 109,930367    | 25,9397111 | 152,866515             | 59,7306072 |
|               |            |               |            |                        |            |               |            |               |            | 132,53947              | 46,7592862 |
|               |            |               |            |                        |            |               |            |               |            | 135,899848             | 52,0418665 |
|               |            |               |            |                        |            |               |            |               |            | 146,6182               | 52,4176921 |
|               |            |               |            |                        |            |               |            |               |            | 127,802623             | 51,0442069 |
|               |            |               |            |                        |            |               |            |               |            | 139,441546             | 44,9927987 |
|               |            |               |            |                        |            |               |            |               |            | 144,485113             | 37,0344184 |

**Table S4: AFM data.** E values obtained from each hydrogel surface region, extracted from matrices of 68 (8x8) force curves measured over a squared array of 20x20 μm. E values from each surface region were averaged to obtain one mean value - so that Young's modulus of each sample (n) was represented by at least 5 mean values and each hydrogel condition by 15 mean values (n = 3). The distribution of mean values obtained with the colloidal tip is not normal, so data were statistically analysed using non-parametric tests (Kruskal-Wallis test with Dunn's correction for multiple comparisons).

| Fluorescent peptide grafting of GRGDSPC-TAMRA+BMP-2-bp (RGD) mixtures vs GRGDSPC+BMP-2bp-TAMRA (BMP) mixtures |            |            |            |            |            |            |            |                |                |                |                |
|---------------------------------------------------------------------------------------------------------------|------------|------------|------------|------------|------------|------------|------------|----------------|----------------|----------------|----------------|
| 65mM-3 RGD                                                                                                    | 50mM-5 RGD | 65mM-4 RGD | 65mM-5 RGD | 65mM-3 BMP | 50mM-5 BMP | 65mM-4 BMP | 65mM-5 BMP | 65mM-3 RGD+BMP | 50mM-5 RGD+BMP | 65mM-4 RGD+BMP | 65mM-5 RGD+BMP |
|                                                                                                               | ns         | ***            | ***            | ***            | ***            |
| 65mM-3 RGD                                                                                                    |            | ns         | ns         | ns         | ns         | ns         | ns         | ***            | ***            | ***            | ***            |
|                                                                                                               | 50mM-5 RGD |            | ns         | ns         | ns         | ns         | ns         | ***            | ***            | ***            | ***            |
|                                                                                                               |            | 65mM-4 RGD |            | ns         | ns         | ns         | ns         | ***            | ***            | ***            | ***            |
|                                                                                                               |            |            | 65mM-5 RGD |            | ns         | ns         | ns         | ***            | ***            | ***            | ***            |
|                                                                                                               |            |            |            | 65mM-3 BMP |            | ns         | ns         | ***            | ***            | ***            | ***            |
|                                                                                                               |            |            |            |            | 50mM-5 BMP |            | ns         | ***            | ***            | ***            | ***            |
|                                                                                                               |            |            |            |            |            | 65mM-4 BMP |            | ***            | ***            | ***            | ***            |
|                                                                                                               |            |            |            |            |            |            | 65mM-5 BMP | ***            | ***            | ***            | ***            |
|                                                                                                               |            |            |            |            |            |            |            | 65mM-3 RGD+BMP | ns             | ns             | ns             |
|                                                                                                               |            |            |            |            |            |            |            |                | 50mM-5 RGD+BMP | ns             | ns             |
|                                                                                                               |            |            |            |            |            |            |            |                |                | 65mM-4 RGD+BMP | ns             |
|                                                                                                               |            |            |            |            |            |            |            |                |                |                | 65mM-5 RGD+BMP |

**Table S5: ONE-WAY ANOVA (Tukey's correction for multiple comparisons) analysis of fluorescence intensity measurements of surface-grafted peptides reported in Fig. 4. P<0.05 (\*), P<0.01 (\*\*), P<0.001 (\*\*\*). Not significant = P > 0.05.**

| Cell spreading area |        |        |        |        |
|---------------------|--------|--------|--------|--------|
| Glass control       | 65mM-3 | 50mM-5 | 65mM-4 | 65mM-5 |
| Glass control       | ***    | *      | ns     | *      |
|                     | 65mM-3 | ***    | ***    | ***    |
|                     |        | 50mM-5 | ns     | ns     |
|                     |        |        | 65mM-4 | ns     |
|                     |        |        |        | 65mM-5 |

  

| Aspect ratio  |        |        |        |        |
|---------------|--------|--------|--------|--------|
| Glass control | 65mM-3 | 50mM-5 | 65mM-4 | 65mM-5 |
| Glass control | ***    | ns     | **     | **     |
|               | 65mM-3 | ***    | ns     | ns     |
|               |        | 50mM-5 | ***    | ***    |
|               |        |        | 65mM-4 | ns     |
|               |        |        |        | 65mM-5 |

**Table S6: Kruskal-Wallis test (with Dunn's correction for multiple comparisons) of cell spread area and aspect ratio 6h after seeding.** Data were calculated from fluorescence intensity measurements after 6h of culture in DMEM (without Red Phenol) on selected DGL G5-PEG hydrogel surfaces and in DMEM + 10%FBS for glass controls. P<0.05 (\*), P<0.01 (\*\*), P<0.001 (\*\*\*). Not significant = P > 0.05.

| Cell spreading area after two weeks of culture in OM |        |        |        |        |
|------------------------------------------------------|--------|--------|--------|--------|
| Glass control                                        | 65mM-3 | 50mM-5 | 65mM-4 | 65mM-5 |
| Glass control                                        | ***    | ***    | ns     | ns     |
|                                                      | 65mM-3 | ns     | ***    | ***    |
|                                                      |        | 50mM-5 | ***    | ***    |
|                                                      |        |        | 65mM-4 | ns     |
|                                                      |        |        |        | 65mM-5 |

| Aspect ratio after two weeks of culture in OM |        |        |        |        |
|-----------------------------------------------|--------|--------|--------|--------|
| Glass control                                 | 65mM-3 | 50mM-5 | 65mM-4 | 65mM-5 |
| Glass control                                 | ***    | ***    | ns     | ns     |
|                                               | 65mM-3 | ns     | ***    | ***    |
|                                               |        | 50mM-5 | **     | *      |
|                                               |        |        | 65mM-4 | ns     |
|                                               |        |        |        | 65mM-5 |

| Cell (nuclei) counts after two weeks of culture in OM |        |        |        |        |
|-------------------------------------------------------|--------|--------|--------|--------|
| Glass control                                         | 65mM-3 | 50mM-5 | 65mM-4 | 65mM-5 |
| Glass control                                         | ***    | ns     | **     | ns     |
|                                                       | 65mM-3 | **     | ns     | **     |
|                                                       |        | 50mM-5 | ns     | ns     |
|                                                       |        |        | 65mM-4 | ns     |
|                                                       |        |        |        | 65mM-5 |

| OPN nuclear expression after two weeks of culture in OM |        |        |        |        |
|---------------------------------------------------------|--------|--------|--------|--------|
| Glass control                                           | 65mM-3 | 50mM-5 | 65mM-4 | 65mM-5 |
| Glass control                                           | ns     | ns     | ***    | ***    |
|                                                         | 65mM-3 | ns     | ***    | ***    |
|                                                         |        | 50mM-5 | ***    | ***    |
|                                                         |        |        | 65mM-4 | ***    |
|                                                         |        |        |        | 65mM-5 |

**Table S7: Kruskal-Wallis test (with Dunn's correction for multiple comparisons) of cell spread area, aspect ratio, cell counts and osteopontin expression after two weeks of culture in OM.** Data were calculated according to fluorescence intensity measurements. P<0.05 (\*), P<0.01 (\*\*), P<0.001 (\*\*\*). Not significant = P > 0.05.
